# Supplementary material
Source: ML conference proceedings conference paper supplement (https://proceedings.neurips.cc/paper_files/paper/2020/hash/234e691320c0ad5b45ee3c96d0d7b8f8-Abstract.html)
Supplement: Supplementary file [file 234e691320c0ad5b45ee3c96d0d7b8f8-Supplemental.zip]

---

# Input-Aware Dynamic Backdoor Attack

## — Supplementary material —

---

Anonymous Author(s)

Affiliation

Address

email

### Abstract

1 Besides the main paper, we also provide a PDF and code as supplementary materials.  
2 This PDF contains detailed information about the datasets and the systems that we  
3 used in the experiments. It then provides more examples of the generated backdoor  
4 images and GradCam inspection results in single-target attack experiments. Finally,  
5 we present our experiments on all-to-all attack scenarios, in which multiple target  
6 labels are used.

## 7 1 System details

### 8 1.1 Datasets

9 We conduct our experiments in 3 datasets, from simple to more complex ones. Importantly, these  
10 datasets are all used in numerous previous works in both attack and defense studies. This makes our  
11 results more comparable and reliable.

#### 12 1.1.1 MNIST

13 The dataset [1] is a subset of a larger set available from the National Institute of Standards and  
14 Technology (NIST). It consists of 70,000 grayscale images of handwritten digits at resolution  $28 \times 28$ .  
15 The dataset is divided into a training set of 60,000 images and a test set of 10,000 images. It could be  
16 found at <http://yann.lecun.com/exdb/mnist/>.

17 During the training step, we randomly apply random cropping to the input image. No augmentation  
18 is applied in the evaluation stage.

#### 19 1.1.2 CIFAR-10

20 CIFAR-10 [2] is a labeled subset of the 80-millions-tiny-images dataset, collected by Alex Krizhevsky,  
21 Vinod Nair, and Geoffrey Hinton. The dataset consists of 60,000 color images at resolution  $32 \times 32$   
22 of 10 different classes, with 6,000 images per class. It is splitted into two sets: the training set  
23 of 50,000 images and the test set of 10,000 images. The dataset is public and available in <https://www.cs.toronto.edu/~kriz/cifar.html>.  
24

25 We apply random crop, random rotation, and random horizontal flip during the training process. In  
26 the evaluation stage, no augmentation is applied.

#### 27 1.1.3 GTSRB

28 The German Traffic Sign Recognition Benchmark - GTSRB [3] dataset is originally from a challenge  
29 held at the International Joint Conference on Neural Networks (IJCNN) 2011. This dataset contains



more than 50,000 images with 43 classes. Image sizes vary from  $15 \times 15$  to  $250 \times 250$  pixels. It comprises a training set of 39,209 images and a test set of 12,630 images. The GTSRB dataset is publicly available at <http://benchmark.ini.rub.de/?section=gtsrb&subsection=dataset>.

In both training step and evaluation step, images are resized into  $32 \times 32$  pixels. Input images are then applied random crop and random rotation in the training procedure. No augmentation is applied during the evaluation procedure.

## 1.2 Classifiers

### 1.2.1 MNIST

We use a simple convolution net for this dataset. Detailed architecture will be mentioned below.

Table 1: Detailed architecture of MNIST classifier. \* means the layer is followed by a Dropout.

| Layer   | Filter | Filter Size  | Stride | Activation |
|---------|--------|--------------|--------|------------|
| Conv2d* | 32     | $5 \times 5$ | 1      | ReLU       |
| Maxpool | 32     | $2 \times 2$ | 2      | -          |
| Conv2d* | 64     | $5 \times 5$ | 1      | ReLU       |
| Maxpool | 64     | $2 \times 2$ | 2      | -          |
| Linear* | 1024   | -            | -      | ReLU       |
| Linear  | 10     | -            | -      | Softmax    |

### 1.2.2 CIFAR-10 and GTSRB

For the CIFAR-10 and GTSRB datasets, we use PreActRes18 [4] structure for the classifier.

## 1.3 Trigger mask and pattern generators

For simplicity, in the paper, we mentioned the trigger generator  $g$  as a whole. In practice, we divided it into two networks  $g_m$  and  $g_p$  for trigger mask generation and trigger pattern generation. These networks have the same structure as presented in the paper except the number of output channels;  $g_m$  returns a single-channel output mask.

The pattern generator  $g_p$  is jointly trained with the classifier, as described in the paper. To make the training process stable, we pre-train the mask generator  $g_m$ , then freeze it during the main training process.

## 1.4 Training details

We use Adam optimizer for training mask generator  $g_m$ , with the learning rate of 0.01. This learning rate drops 10 times each 10 epochs. We train  $g_m$  for 25 epochs, then freeze this module for continue training classifier  $f$  and pattern generator  $g_p$ .

We use Adam optimizer for training pattern generator  $g_p$  with the learning rate of 0.01. Learning rate of  $g_p$  drops 10 times for each 100 epochs since the 200<sup>th</sup> epoch. For the classifier  $f$ , we use SGD optimizer with the learning rate of 0.01. The learning rate of  $f$  reduces by 10 times every 100 epochs. We train  $g_p$  and  $f$  simultaneously and until the models converge at  $\sim 600$  epochs.

## 1.5 Running time

We use a system of a GPU RTX 2080Ti and a CPU i7 9700K to conduct our experiment. Detailed inference time of each module will be demonstrated below.



Table 2: Inference time of our modules.

|          | Classifier ( $f$ ) | Mask generator ( $g_m$ ) | Pattern generator ( $g_p$ ) |
|----------|--------------------|--------------------------|-----------------------------|
| MNIST    | 6.51 <i>ms</i>     | 0.94 <i>ms</i>           | 0.99 <i>ms</i>              |
| CIFAR-10 | 7.96 <i>ms</i>     | 1.36 <i>ms</i>           | 1.41 <i>ms</i>              |
| GTSRB    | 7.88 <i>ms</i>     | 1.36 <i>ms</i>           | 1.42 <i>ms</i>              |

## 2 Additional experiment results

### 2.1 Sample backdoor images

We present sample backdoor images generated by our systems, in comparison to the ones from the traditional BadNet models, in Fig. 1. As can be seen, our backdoor trigger varies from image to image.

### 2.2 Network inspection

We present more GradCam inspection results of our backdoor networks on GTSRB and CIFAR-10 dataset in Fig. 2.

## 3 All-to-all attack

Besides the single-target attack scenario, we also verify the effectiveness of input-aware dynamic backdoor attack in multi-target scenario, often called all-to-all attack. In this scenario, the input of class  $y$  would be targeted into class  $y + 1$ .

### 3.1 Experimental Setup

We use the same experimental setups as in the single-target scenario, with a small modification. In the attack mode at training, we replace the fixed target label  $c$  by  $y + 1$ . In the attack test at evaluation, we also change the expected label similarly.

### 3.2 Sample backdoor images

We present sample backdoor images generated by our systems, in comparison to the ones from the traditional BadNet models, in Fig. 3.

### 3.3 Attack experiments

We conducted attack experiments and reported results in Table ???. While models still achieve state-of-the-art performance on clean inputs, the attack efficacies slightly decreases. This is due to the fact that the target label now varies from input to input. Though, the lowest attack accuracy is 93.16%, which is still pretty high.

Similar to the single-target scenario, the triggers are still nonreusable, proved by the cross-trigger accuracies.

Table 3: All-to-all attack result.

| Dataset  | Clean | Attack | Cross |
|----------|-------|--------|-------|
| MNIST    | 99.46 | 98.47  | 94.34 |
| CIFAR-10 | 94.49 | 93.16  | 89.40 |
| GTSRB    | 98.93 | 98.13  | 94.29 |



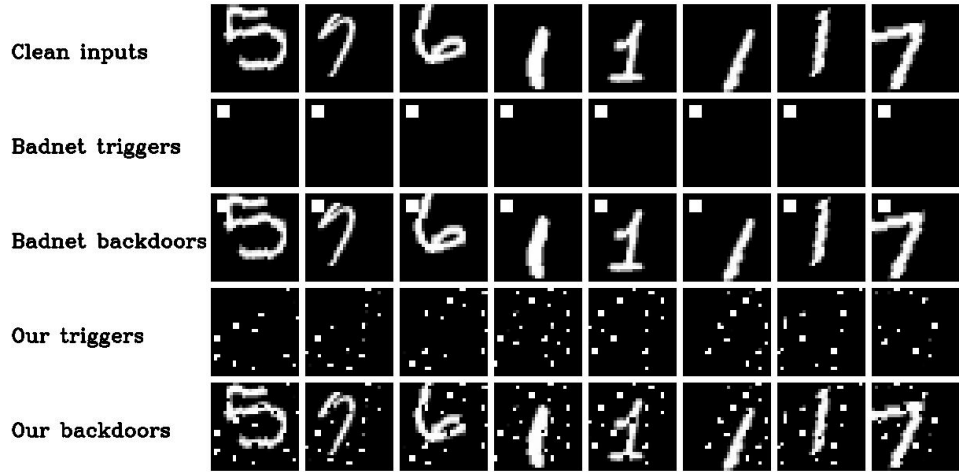

(a) MNIST

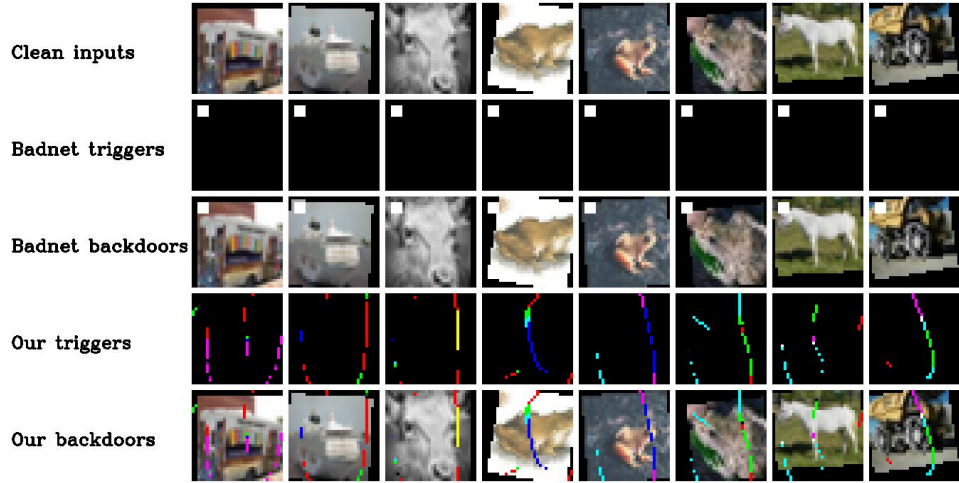

(b) CIFAR-10

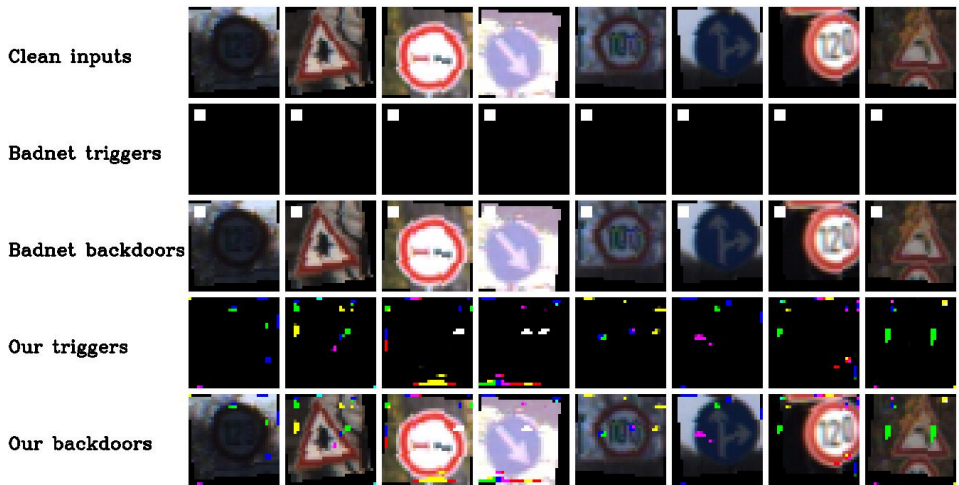

(c) GTSRB

Figure 1: **Sample backdoor images.** The first row are clean images. The second and the third rows are badnet's patterns and badnet's images. The fourth and the final rows are our patterns and backdoor images.



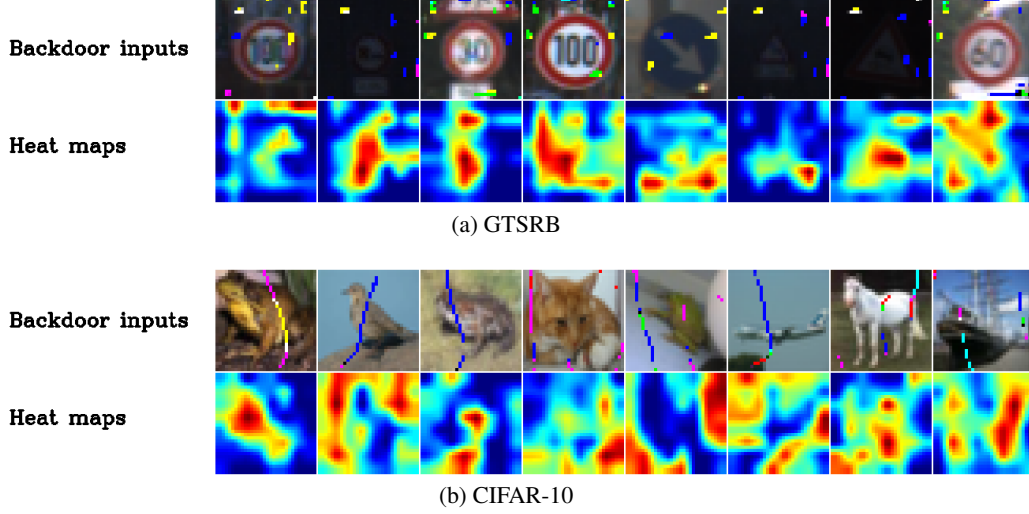

Figure 2: **All-to-one attack**: Backdoor inputs and their corresponding heatmaps.

### 86 3.4 Defense experiments

87 We repeat the same defense experiments used in the single-target scenario. Our backdoor models can  
88 pass all the tests as can be seen in Fig. 4, 5, and 6.

### 89 3.5 Behaviour analyses

#### 90 3.5.1 Image regularization

91 Similar to the single-target scenario, we apply different image regularization techniques on the  
92 CIFAR-10 backdoor model trained for the all-to-all attack, as shown in Fig. ???. In all tests, the clean  
93 and attack accuracy are pretty similar, negating backdoor mitigation attempts.

Table 4: **Effect of image regularization on the CIFAR-10 backdoor model, all-to-all attack scenario.**

| Test   | Original | Spatial smoothing |       | Color depth shrinking |        |       |
|--------|----------|-------------------|-------|-----------------------|--------|-------|
|        |          | k = 3             | k = 5 | 3 bits                | 2 bits | 1 bit |
| Clean  | 94.49    | 68.37             | 34.76 | 86.56                 | 63.60  | 28.22 |
| Attack | 93.16    | 66.63             | 35.29 | 85.38                 | 62.26  | 25.18 |

#### 94 3.5.2 Network inspection

95 Finally, we present the GradCam inspection results of our all-to-all backdoor networks on GTSRB  
96 and CIFAR-10 dataset in Fig. 7. The heatmaps, again, spread over the input image, failing to catch  
97 the backdoor regions.

### 98 References

- 99 [1] Yann LeCun, Léon Bottou, Yoshua Bengio, and Patrick Haffner. Gradient-based learning applied to  
100 document recognition. *Proceedings of the IEEE*, 86(11):2278–2324, 1998.
- 101 [2] Alex Krizhevsky et al. Learning multiple layers of features from tiny images. 2009.
- 102 [3] Johannes Stallkamp, Marc Schlipsing, Jan Salmen, and Christian Igel. Man vs. computer: Benchmarking  
103 machine learning algorithms for traffic sign recognition. *Neural networks*, 32:323–332, 2012.
- 104 [4] Kaiming He, Xiangyu Zhang, Shaoqing Ren, and Jian Sun. Deep residual learning for image recognition.  
105 In *Proceedings of the IEEE conference on computer vision and pattern recognition*, 2016.



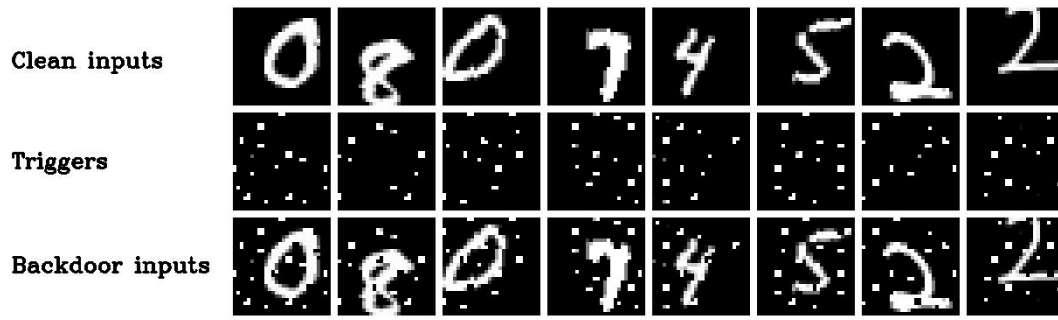

(a) MNIST

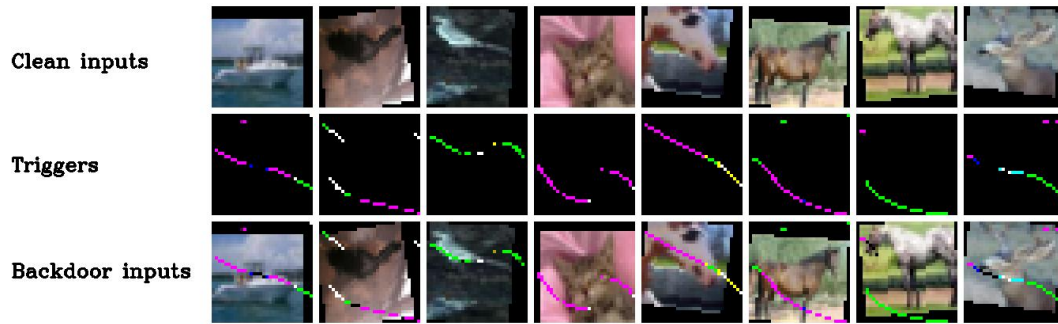

(b) CIFAR-10

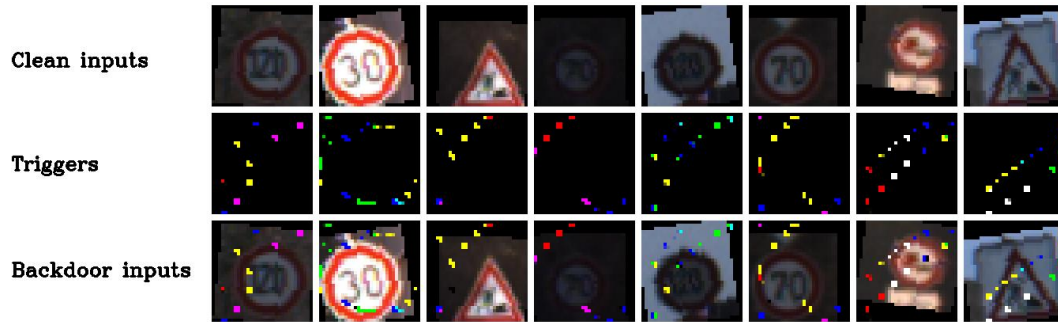

(c) GTSRB

Figure 3: **Sample all-to-all backdoor images.** The first row are clean images. The second and the third rows are triggers and backdoor images, respectively.

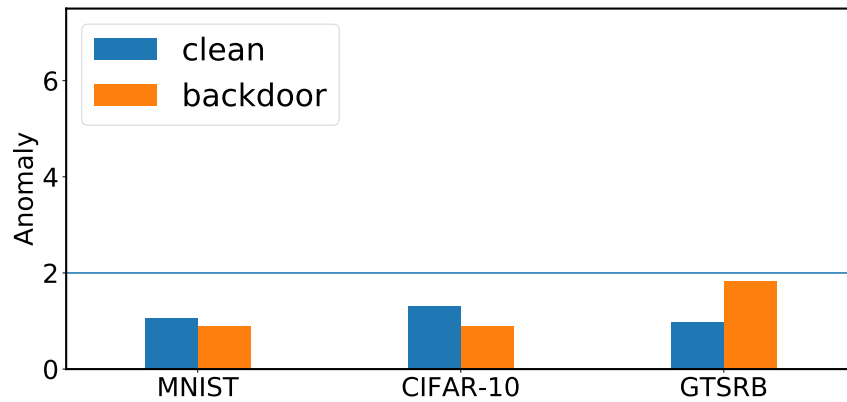

Figure 4: Neural Cleanse



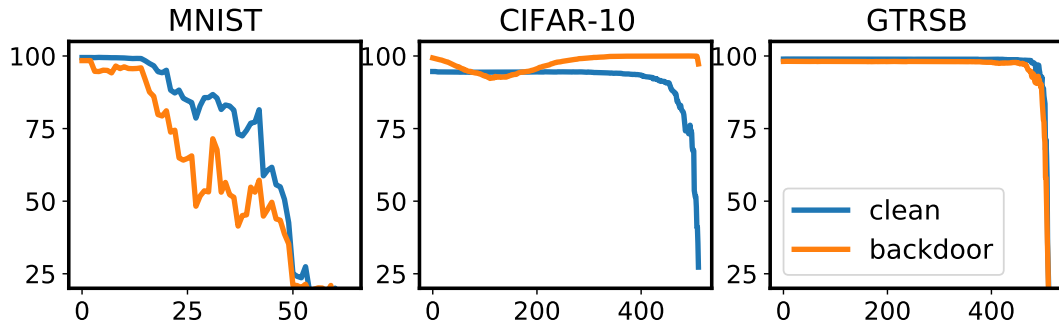

Figure 5: Fine-pruning

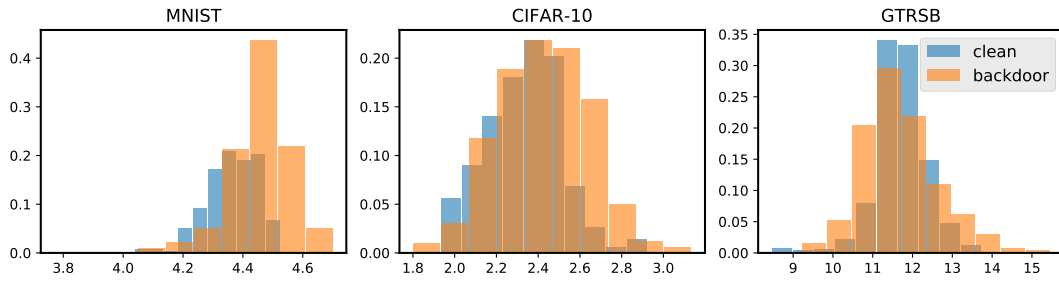

Figure 6: STRIP

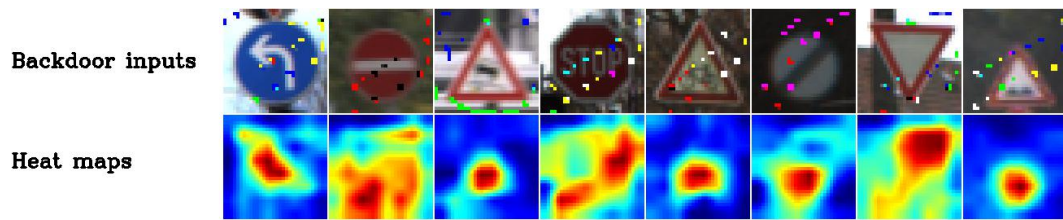

(a) GTSRB

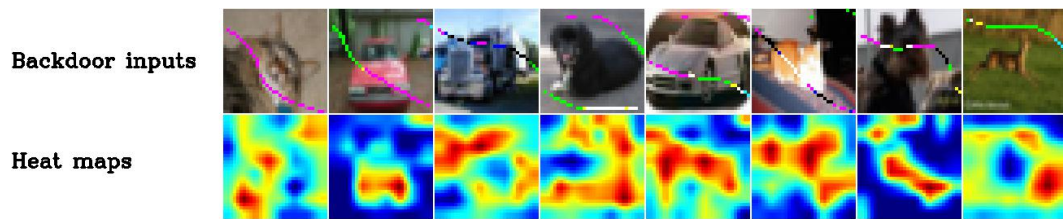

(b) CIFAR-10

Figure 7: **All-to-all attack**: Backdoor inputs and their corresponding heatmaps.
